# Supplementary material for: Cold Atmospheric Plasma Increases Temozolomide Sensitivity of Three-Dimensional Glioblastoma Spheroids via Oxidative Stress-Mediated DNA Damage
Source: PubMed Central journal article supplement (PMC8068248; doi:10.3390/cancers13081780), 2021-04-08
Supplement: cancers-13-01780-s001.pdf [file cancers-13-01780-s001.pdf]

Supplementary Materials

# Cold atmospheric plasma increases temozolomide sensitivity of three-dimensional glioblastoma spheroids via oxidative stress-mediated DNA damage

Priyanka Shaw<sup>1,2\*</sup>, Naresh Kumar<sup>1,3</sup>, Angela Privat-Maldonado<sup>1,2</sup>, Evelien Smits<sup>2</sup>, and Annemie Bogaerts<sup>1\*</sup>

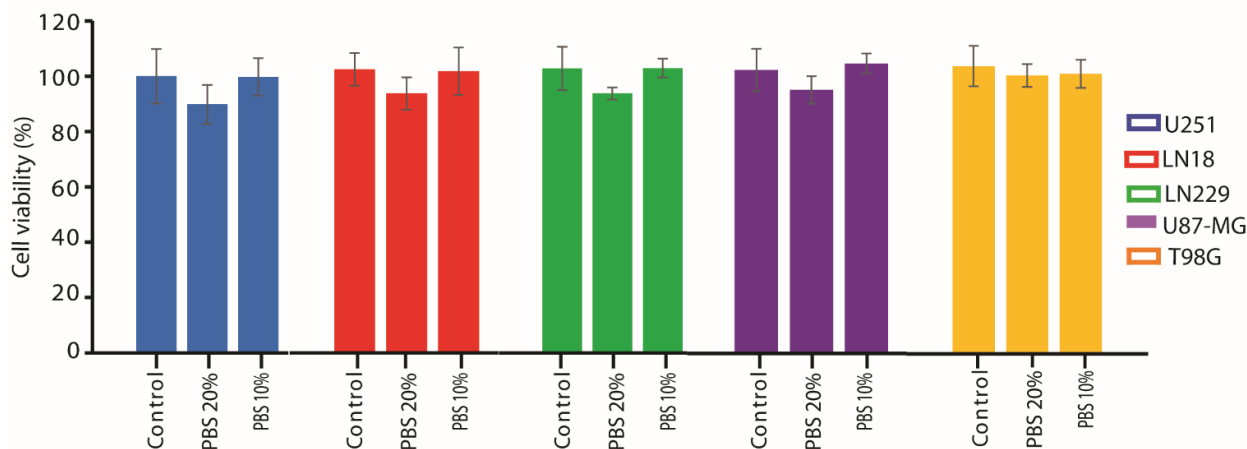

**Figure S1.** Dose-response survival curves of untreated PBS 20% and PBS 10% after 24 hour of stimulation in U251, LN18, LN229, U87-MG and T98G.

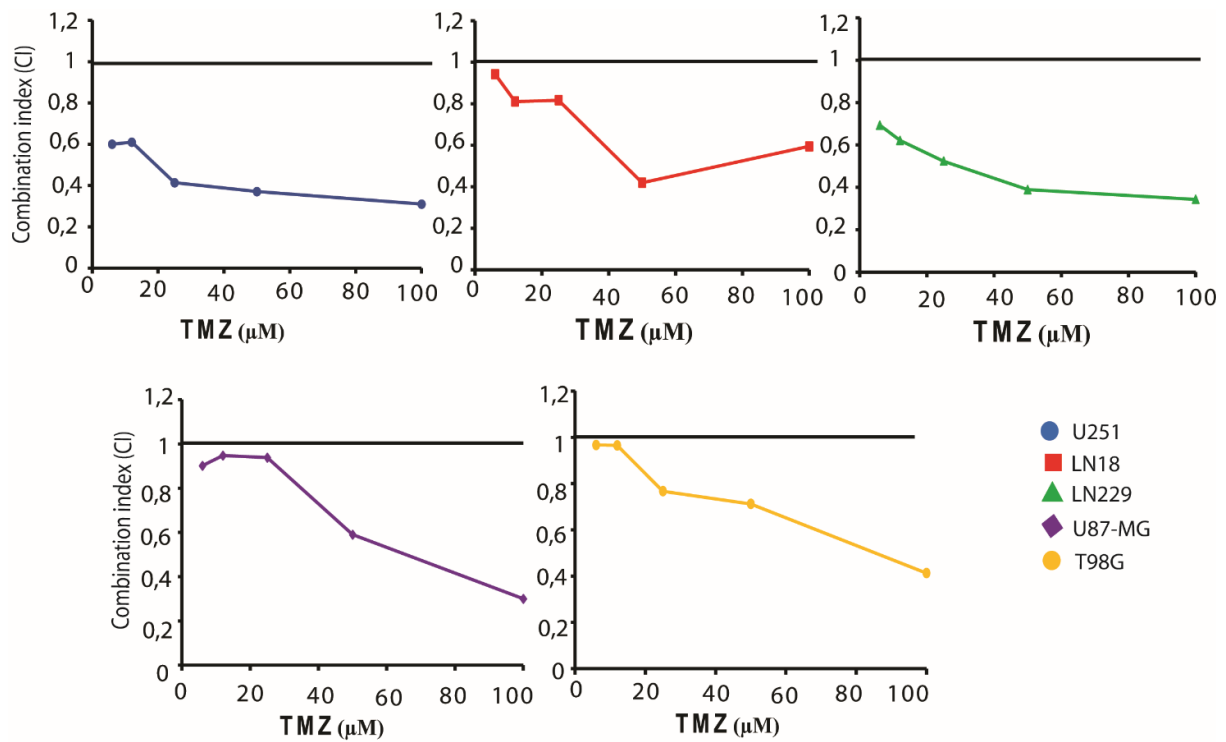

**Figure S2.** Combination index (CI) of (a) PT-PBS (10%) with TMZ (at 100, 50, 25, 12.5 and 6  $\mu\text{M}$ ) in U251, (b) PT-PBS (10%) with TMZ (at 100, 50, 25, 12.5 and 6  $\mu\text{M}$ ) in LN18, (c) PT-PBS (10%) with TMZ (at 100, 50, 25, 12.5 and 6  $\mu\text{M}$ ) in LN229, (d) PT-PBS (15%) with TMZ (at 100, 50, 25, 12.5 and 6  $\mu\text{M}$ ) in U87-MG, and (e) PT-PBS (20%) with TMZ (at 100, 50, 25, 12.5 and 6  $\mu\text{M}$ ) in T98G.
